# Supplementary material for: Persistent firing in LEC III neurons is differentially modulated by learning and aging
Source: eLife. 2020 Jul 20;9:e56816. doi: 10.7554/eLife.56816 (PMC7371426; doi:10.7554/eLife.56816)
Supplement: Figure 4—source data 1. — This excel file contains the values for the mean firing rate and firing rate over time. Data for the cells from YN and AN animals are in Tabs 1 and 2. Data for the cells from YC, YP, AU, and AI are in Tabs 2 and 3. Three sweeps of persistent firing were evoked from each cell. Mean firing rate for each sweep for each cell is shown. Firing rate was averaged over the three sweeps to determine the firing rate over time for each cell. [file elife-56816-fig4-data1.xlsx]

## Sheet: Mean Firing Rate YN, AN
	YN				AN
Cell #	Sweep1	Sweep2	Sweep3		Sweep1	Sweep2	Sweep3
1	2	1			4.21739	2.47826	3.65217
2	4.56522	5.43478	4.21739		1.65217	0.652174	2.52174
3	4.95652	4	5.82609		3.17391	5.30435	4.34783
4	5.26087	3.78261	2.52174		0.043478	0.695652	0.043478
5	3.08696	1.3913	2.43478		6.73913	5.43478	3.65217
6	4.30435	4.21739	1.26087		6.86956	5.65217	5.30435
7	4.30435	4.13044	5.56522		6.86956	4.91304	0
8	3.56522	3.13043	3.43478		4.91304	2.13043	0
9	1.3913	1.47826	2.30435		6	4.17391	3.26087
10	9.30435	5.65217	9.13044		0	0	4
11	11.9565	8.26087	12.913
12	3.34783	4	1.6087
13	7	4.13044	4.78261
14	7	6.17391	4.86956
15	6.26087	4.82609	3
16	5.17391	4.95652	3.21739
17	8.26087	7.56522	5.3913
18	9.04348	7.95652	6.34783
19	6.86956	6.04348	3.91304
20	12.3913	11.0435	7.43478
21	8.95652	7.52174	6.26087
22	9.47826	5.69565	5.17391

## Sheet: Rate Over Time YN, AN
	YN																							AN
Time (s)	Cell 1	Cell 2	Cell 3	Cell 4	Cell 5	Cell 6	Cell 7	Cell 8	Cell 9	Cell 10	Cell 11	Cell 12	Cell 13	Cell 14	Cell 15	Cell 16	Cell 17	Cell 18	Cell 19	Cell 20	Cell 21	Cell 22		Cell 1	Cell 2	Cell 3	Cell 4	Cell 5	Cell 6	Cell 7	Cell 8	Cell 9	Cell 10
0-1	0	0	1.33333	0.333333	0	0	0	0	0	0.333333	4.66667	0	0.666667	1.33333	0.666667	0.333333	1	1.66667	0	4	0.666667	0		0	0	0	0	0	1	0.333333	0.333333	0	0
1-2	0	1	3.66667	2.33333	0	1	2	0	0	3.33333	9	0	3.66667	3	2	1.66667	4.33333	5.66667	1.66667	8.66667	4	2.66667		0.333333	0	0	0	1.66667	3	1.33333	0.666667	1.66667	0.333333
2-3	1	2.33333	4	2.66667	1	1.66667	3.66667	0.666667	0	5.66667	10	1.33333	4.66667	4	2.66667	3	6.66667	8	2.66667	10	5.33333	3.66667		1.33333	0.333333	0	0	3.33333	4.33333	2.66667	1	2	1
3-4	1.5	3.33333	4.66667	2.66667	1	2.66667	3.66667	1.66667	0	6.66667	11	1.66667	5.33333	5.33333	3	4	8.66667	9.66667	4	11.6667	7	5.33333		2.66667	1	0.333333	0	3.66667	5.66667	4	1	3.33333	1
4-5	1	5	5.33333	3	1.66667	2.33333	4.66667	2.66667	0	7.66667	11.6667	3.33333	6.33333	6.33333	4.33333	4.33333	9.33333	10.6667	4.33333	11.6667	8	6		2.33333	1	0.333333	0	4	5.66667	4	1	4.33333	1.33333
5-6	2.5	5	4.66667	3	1.66667	3.33333	4.66667	3.66667	1	9	12	3.33333	6.66667	6.66667	4.66667	4.66667	9.66667	11.3333	5	12.3333	8.66667	6.66667		3	1	1	0	4.66667	6	4.33333	2	4.66667	1.33333
6-7	2	6.33333	5.33333	3.66667	2	4	5.33333	4.66667	1.33333	9	12	5	7	7	4.66667	5.33333	10	10.6667	5.66667	12.6667	9.33333	7		4	1	1	0	5	6.66667	4.33333	1.33333	5	1.33333
7-8	2	6.33333	5.33333	3.33333	2.33333	3.66667	5.33333	5	1.33333	9	12	4.66667	6.66667	7	4.66667	5.33333	10	11	6.33333	12.3333	10	7		3.33333	1.66667	2	0.333333	5.33333	6.66667	5.66667	2.66667	5	1.66667
8-9	2.5	6	5	4	2	3.66667	5.33333	5	1.66667	9.33333	12	5.33333	7	7.33333	5	5.66667	9.33333	10	6.33333	11.6667	9.66667	7.33333		3.66667	1.33333	3	0	5.66667	6.66667	5.66667	3	5.66667	1.33333
9-10	2.5	7	5.33333	4	2.66667	4.33333	5.33333	5	1.33333	9.33333	12.3333	4.33333	6.33333	8	5.33333	5	9	9.66667	6.33333	12	9.33333	7.33333		4	1.66667	3.33333	0.333333	5.66667	6.33333	5	3	5	1.66667
10-11	2.5	6.33333	5.33333	3.66667	2.66667	4	5.33333	4.66667	2.33333	9.33333	12	4.33333	6	7	5.66667	6	8.66667	9.33333	7.66667	11	9.33333	7.33333		4.66667	1.66667	4	0.333333	5.66667	6.66667	5.33333	3	5.66667	1.33333
11-12	3	6.66667	5.66667	4.33333	2.66667	4	5.66667	4.33333	2	9	11.6667	3.66667	6	7.66667	5	5.66667	8	8	7	11	9.33333	8		4	2	5	0	6	6.66667	4.66667	3.66667	5	1.66667
12-13	3	6.33333	5.66667	4.33333	3	4	5.33333	4	2.66667	9	12.3333	3	5.66667	7	6	5	7.33333	8	6.33333	11	8.66667	7.33333		4.66667	1.66667	7	0.333333	6	6.66667	4.66667	3	5.33333	1.33333
13-14	2.5	5.33333	5.33333	4.33333	3	4	5.33333	3.66667	2	9	11.3333	3.33333	5.33333	7	5.33333	5.33333	7.66667	7.66667	7	10	8.33333	7.33333		4	2.33333	5.66667	0.333333	6.33333	6.33333	4	3	5	1.66667
14-15	2.5	6	5.66667	4.66667	3	3.66667	5.33333	3.66667	3	9	12	3.33333	5.33333	6.66667	5.33333	5	6.66667	6.66667	6.66667	10.3333	8	7		4	2	6.66667	0.333333	6	6.66667	4	3.33333	5	1.33333
15-16	3	5.33333	5.33333	4.66667	2.66667	4	5	4.33333	2.66667	9	11.3333	3	5.33333	6.66667	5.66667	4.66667	6.33333	7.33333	6	10	8	7.66667		4.66667	2	6.33333	0.333333	6.33333	6.66667	4	3.66667	5.33333	1.66667
16-17	3	4.66667	5.33333	4	3	3	5.33333	3.66667	3.33333	8.66667	11	3	4.33333	6.66667	5.66667	4.66667	6	6.33333	6.66667	9.66667	7.66667	7.33333		4	2.33333	7	0.333333	6.33333	6.66667	4	3	5	1.66667
17-18	3	4.66667	5.33333	5	3	3.66667	5.33333	4.33333	2.33333	9	11.6667	2.66667	5	6	5.33333	4.33333	6.33333	7	6.33333	9.33333	7.33333	7.33333		4	2	7	0.333333	6.66667	6.33333	4.33333	2.66667	5	1.33333
18-19	3	4.33333	5.33333	4.66667	3	3.33333	5	3.66667	2.33333	8.66667	11	3.33333	5.33333	6	5.33333	4.66667	6	6.33333	6.66667	9.66667	7.66667	8.33333		4.33333	1.66667	7.66667	0.333333	6.33333	6.66667	3.33333	2.66667	5	1.66667
19-20	3	4.33333	5	5	3.66667	4	5	3	2.66667	8.66667	10.6667	2.33333	4.66667	5.66667	5.33333	4.66667	5.33333	6	6.66667	10	7	9		4.33333	3	7.33333	1	6.33333	6.66667	3.66667	3	5	1.66667
20-21	3	4	5.33333	5	2.66667	3.33333	5.33333	3	2.33333	9	10.6667	2.66667	5.33333	5.33333	5.66667	4.66667	5.33333	6	6.33333	9	7	9		4	1.66667	7.33333	0.666667	6.66667	6.33333	3.66667	2.33333	5.33333	1.33333
21-22	3	4.33333	4.66667	5	3	3.66667	4.66667	3.66667	3	8.66667	11	2.33333	5	5.66667	5.33333	4	5.66667	5.66667	7	9.33333	7.33333	8.66667		4	2.66667	7.66667	0.666667	6.66667	6	3.33333	2.33333	4.66667	1.66667
22-23	2.5	4.33333	4.66667	5	3.33333	3.66667	4.66667	3.33333	2.33333	8.33333	10.6667	2.66667	4.33333	5	5.33333	4.33333	5.33333	6.33333	6.33333	9.33333	6.66667	8.66667		4	3	8.66667	0.333333	7	6.33333	4	2.33333	5	1.33333

## Sheet: Mean Firing Rate YC, YP, AU, AI
	YC				YP				AU				AI
Cell #	Sweep1	Sweep2	Sweep3		Sweep1	Sweep2	Sweep3		Sweep1	Sweep2	Sweep3		Sweep1	Sweep2	Sweep3
1	8.86956	8.78261	7.82609		6.04348	11.4783	8.17391		3.34783	1.43478	2.08696		3.73913	3.04348	3.21739
2	9.21739	7.21739	6.13044		3.17391	1	5.34783		5.08696	6.91304	6.91304		7.30435	4.95652	4.73913
3	10.4348	9.34783	9.82609		6.43478	6.91304	5.30435		9.34783	6.52174	5.3913		4.47826	1.52174	4.21739
4	11	9.3913	10.0435		4.04348	3	3.30435		4.43478	5.34783	4.17391		0	2.21739	2.13043
5	9.43478	10.7391	10.6522		7.65217	5.82609	6.34783		4.04348	4.04348	2.82609		4.6087	5.17391	4.21739
6	12.9565	13.5217	12.3043		11.2174	10.6087	8.13044		6.47826	6.04348	5.34783		5.73913	0.434783	2.69565
7	11.9565	9.73913	10.7826		8.34783	7.65217	5.26087		7.21739	3.95652	4.08696		4.26087	4.17391	4.47826
8	7.78261	6.6087	8.26087		5.30435	7.17391	4.13044		6.08696	5.34783	4.86956		6.26087	5.30435	4.21739
9	9	5.86956	7.34783		5.78261	8.47826	7.86956		4.82609	5.95652	4.91304		6	7.04348	4.34783
10	11.0435	8.56522	9		9.56522	6.34783	8.95652		5.56522	4.43478	4.30435		4.3913	3.21739	3.52174
11	11.8261	11.3913	11.3043		4.26087	4.6087	4.3913		6.13044	5.08696	5.34783		5.6087	6.04348	6.56522
12	5.56522	5.82609	5.13044						9.82609	11.2174	8.91304		5.69565	5.3913	0
13									6.08696	5.56522	4.47826		9.91304	7	6.73913
14									9.65217	7.30435	5.43478		7.82609	8.30435	5.69565
15									5.21739	4.04348	4.95652		8.3913	5.69565	5.52174
16									8.65217	6.65217	5.78261		3.6087	4.21739	5.17391
17									9.26087	10.5217	8.17391		4.86956	0	3.78261
18									4.04348	4.34783	3.86957
19									7.69565	7.73913	7.95652

## Sheet: Rate Over Time YC, YP, AU, AI
	YC													YP												AU																				AI
Time (s)	Cell 1	Cell 2	Cell 3	Cell 4	Cell 5	Cell 6	Cell 7	Cell 8	Cell 9	Cell 10	Cell 11	Cell 12		Cell 1	Cell 2	Cell 3	Cell 4	Cell 5	Cell 6	Cell 7	Cell 8	Cell 9	Cell 10	Cell 11		Cell 1	Cell 2	Cell 3	Cell 4	Cell 5	Cell 6	Cell 7	Cell 8	Cell 9	Cell 10	Cell 11	Cell 12	Cell 13	Cell 14	Cell 15	Cell 16	Cell 17	Cell 18	Cell 19		Cell 1	Cell 2	Cell 3	Cell 4
0-1	2	0.666667	5	2.66667	2.33333	5.33333	2.66667	2	1.66667	2	5.33333	0		2	0.333333	0	0	1.33333	3.33333	1.66667	0	1.66667	3	0		0	0	3	0.333333	0	0.333333	0.333333	0	0.666667	0.333333	0	1.66667	0.333333	1.33333	0	1.33333	3.33333	0.666667	1		0	0.333333	0	0
1-2	5.33333	4.33333	9.33333	7.33333	6.33333	11	6.66667	5	5	6.33333	9.66667	1.33333		5	1	1.33333	0.666667	6.33333	6.33333	4.66667	0.333333	4.66667	7.33333	1.66667		0.333333	2.33333	7.33333	2.66667	0.666667	1.66667	2.33333	2.33333	2.66667	2.66667	2.33333	4.66667	2	4	2.33333	4.33333	7	2.33333	4		0.666667	2.33333	1.33333	0
2-3	8.66667	5.33333	10	9.33333	8.66667	13.3333	9.33333	6.66667	6.66667	7.66667	11.3333	3		6.33333	2	3.33333	1.66667	9	8.33333	6.66667	0.333333	5.66667	8.33333	3		1	3	8.66667	4	1.66667	3	2.33333	4.66667	4	4.66667	3.33333	7	3.66667	4.66667	2.66667	5.66667	8.33333	3	5.66667		1.66667	3.66667	2.33333	0.333333
3-4	10.6667	7.33333	10.3333	11	10	13.3333	11	7.66667	7	8.66667	12.6667	3.33333		8	2.66667	6.33333	2.33333	9.66667	9.66667	7.33333	1	7.66667	10	4		1	4.33333	10	4.66667	2	4	3.33333	6	4.33333	5	4.66667	9	4	6.66667	4	6.66667	8	5.33333	7		1.66667	3.66667	3	1.33333
4-5	11.6667	7.66667	11	11	11.6667	14.6667	12	8.66667	8	9.33333	12.6667	4.66667		8	3.33333	7	3.33333	9.33333	10.3333	7.66667	1.66667	8.33333	10	4.33333		1.33333	4	10.3333	5.33333	2.66667	4.66667	4	6.66667	4.66667	5.33333	5.66667	9.66667	4.66667	6.66667	4.33333	8	9.33333	5.66667	8.33333		2	4.33333	3.33333	0.666667
5-6	12.6667	9	11.3333	12	12.6667	14.6667	12	9	8.66667	9.66667	13.6667	5.66667		9	3.66667	8.66667	2.66667	9.66667	10.6667	8.33333	3.33333	10	10.3333	5		1.33333	5.66667	10.3333	5.66667	3	5	4.33333	7	5.33333	6.33333	6.33333	10.3333	5.33333	8	5.33333	9	9.33333	5.66667	8.66667		2.33333	4.66667	3.33333	1.33333
6-7	12	8.33333	11.3333	11.3333	12.3333	14.6667	13	9	8.66667	10	13	6.33333		9.33333	4.33333	9	3.66667	8.66667	11	8	4	9.66667	9.66667	5.33333		2	5	9.66667	6.33333	3	6	5	7.33333	6	6	7	11	5.66667	8	6	8.66667	9.66667	5.66667	9.33333		2.66667	5	4.66667	1.33333
7-8	11	8.66667	11.3333	11.6667	12.3333	14.6667	13	9	9	10	13	6		9.66667	4.33333	8.66667	3.33333	9	11.3333	8.33333	4.66667	10	10.3333	5.33333		2	6.66667	9.33333	5.66667	3.66667	6	5.33333	7	6	6.33333	7.33333	11.3333	6	8.66667	6	9	9.66667	5	9.33333		3	5	3.66667	1.33333
8-9	10	8.33333	11.3333	11.3333	12.3333	14.3333	13	9.33333	9	10.6667	12.6667	6.66667		10	5	8.66667	4	8.33333	10.6667	8	5.33333	10	10	5.33333		2	7	9.66667	5.33333	3.66667	7	5.33333	6.66667	6.33333	6	7.66667	11	6.66667	9	6	8.66667	10	5.33333	9.66667		2.66667	5.66667	3.66667	1.66667
9-10	9.66667	8.33333	10.6667	11	12	14	12.3333	8.33333	8.66667	10	12.6667	6.33333		9.66667	4.33333	8	4	7.66667	11	8	5.33333	9.33333	9.33333	5.66667		2.33333	7	8.66667	6	4	7.66667	5.33333	6.66667	6	6	7.66667	11.3333	6.66667	8	6.66667	8.33333	9.66667	5	9.33333		3	5.33333	3.33333	1.33333
10-11	9.33333	8.33333	11	10.6667	11.3333	14	12.3333	8.33333	8.66667	10.3333	12.3333	7.33333		9.33333	4	7.33333	4.33333	7.33333	11.3333	7.33333	6.33333	9.33333	9.66667	5.66667		2.33333	7.33333	8	5.66667	4.33333	6.66667	5.66667	5.66667	6.33333	6	7.33333	11	6.33333	9	6.33333	8	9.66667	4	9.66667		3.66667	5.66667	3.66667	1.66667
11-12	8.33333	8.33333	10.6667	10.6667	11.3333	13.6667	12	8	8.66667	10.3333	12	6.66667		9.66667	4.33333	7	4.33333	7	10.6667	7.33333	6.66667	8.33333	8.33333	5.33333		2.66667	7.33333	7.33333	6	4.33333	7.33333	5.33333	5.66667	6.33333	5	7.33333	11	6.66667	8.33333	6.33333	7.66667	10.6667	4.33333	8.66667		4	6	3	1.66667
12-13	8.66667	8.66667	10	10.6667	10.6667	13	11.3333	8	8	10.3333	12.3333	6.66667		9.33333	4	7	4.66667	6.33333	11	7.33333	7.33333	8.33333	8.33333	5		2.33333	7.66667	7.33333	5	4.33333	7.33333	6.33333	5.66667	6.33333	5.66667	7.66667	11.3333	6.66667	8.33333	5.66667	7.33333	9.33333	4.33333	9		3.66667	7	3	2
13-14	8.66667	8.33333	10	10.6667	11.3333	13	11.3333	7.66667	8	10.6667	11.6667	7		10	3	6.66667	4	6	11	7.33333	7	8	7.66667	5		3.33333	8	6.33333	5.33333	4.66667	7.66667	6	5.33333	5.66667	4.66667	6.33333	10.6667	6.66667	8.66667	5.66667	7.66667	9.33333	4.33333	8.66667		3.66667	6.66667	3.33333	2
14-15	7.66667	8	9.66667	10	12	12.6667	11.3333	7.66667	7.66667	10.6667	11.6667	6.66667		9	3.66667	6.66667	4.66667	5.66667	11	7.33333	7.66667	7.66667	9	4.66667		2.66667	7.33333	6	4.66667	4.66667	7.33333	5.33333	5.33333	5.66667	4.33333	6	11	6	8.66667	6	6.66667	9.66667	3.33333	8.33333		4.33333	6.33333	2.66667	1.33333
15-16	8	8	9.66667	10.3333	10.3333	13	10.6667	7.66667	7.66667	10.3333	11.3333	6		9.33333	2.66667	6	4.33333	5.66667	10.6667	7.66667	7.66667	6.66667	7.33333	4.66667		3	7.66667	5.66667	5.33333	4.33333	7	6	5.33333	5.66667	4.33333	6	10.6667	6.33333	8	5	7.33333	9.66667	4.33333	8		4	7.33333	3.66667	2
16-17	7.66667	8.33333	9.66667	10.3333	10	13	11	7.66667	7.33333	11	11.3333	6.66667		9	3	6.33333	3.66667	5.33333	10.3333	7.33333	7.66667	6.33333	8	4.66667		3	7.66667	6	4.66667	4.66667	7.33333	6.66667	5.33333	5.66667	4.33333	5	11.3333	6	8.66667	4.66667	6.66667	10.6667	3.66667	8		4.33333	7	4	2
17-18	7.66667	8	9.33333	10.3333	9.66667	12.6667	10.3333	7.33333	7.33333	10.3333	11	6		9.66667	2.33333	6.33333	4.66667	5.33333	10	7.33333	7.66667	6.33333	8	4.33333		3.66667	8	5.33333	4.33333	4.33333	7	6.33333	5.33333	5.33333	4.33333	5.33333	10.6667	5.66667	8	5	7	10.3333	3.66667	8		4.33333	7	4.33333	2
18-19	7.33333	8	9.33333	10	10.3333	12	11	7.33333	6.66667	10.3333	10.6667	6.33333		9	3	5.66667	3.66667	5	10.6667	7.33333	8	6	7.33333	5		2.66667	8	4.33333	4.66667	4.66667	7	6	5.66667	5.33333	4.33333	4.66667	10.3333	5.66667	7.66667	4.33333	6.66667	10.6667	3.66667	8		5	7.33333	4	1.66667
19-20	7.33333	7.66667	9.33333	10.3333	9.66667	12.6667	10.6667	7.33333	7	10	11.3333	6		9.33333	2.66667	6	4	5	10	7	8.33333	6.33333	7.33333	4.33333		3.33333	8	5	4	4.66667	7	6.33333	5.33333	6	4.33333	4.66667	11.3333	5.66667	8	5	6.33333	10.3333	3.66667	7.66667		5.33333	7.66667	4.66667	2
20-21	7	7.66667	9	10	9.33333	12.6667	11	7	7.66667	10.3333	11	5.66667		9	3	5.66667	4	5	10.3333	7	9	7	7.33333	4.33333		3	7.66667	5	3.66667	4.66667	6.66667	6.33333	5.66667	5	4.66667	5	11	6	8	4	7	10	4	8		4.66667	7.33333	4.33333	1.66667
21-22	7	8	9	10.3333	10.3333	12.3333	10.6667	7.66667	6.33333	10	10	6.33333		8.66667	3	6	3.66667	4.66667	10	7.33333	9	6.33333	7	4.33333		4	7.66667	4.66667	4	4.33333	6.66667	6.66667	5.33333	5.33333	4.33333	4.66667	11	5.66667	7.66667	3.66667	6.66667	9.66667	3.33333	7.66667		4.66667	7.33333	4.66667	2
22-23	7	7.66667	8.66667	10.3333	9.33333	12.6667	10.3333	7.33333	7	10.3333	11.3333	6		8.66667	3.33333	5.33333	3.66667	4.66667	10	6.66667	9	6	7	4.66667		3.33333	7.66667	5	3.66667	5.33333	6.66667	6.33333	5	5.66667	4.66667	5	11.3333	5.33333	7.66667	4	7	10	3.66667	7.33333		5.33333	7.66667	4.33333	2
[truncated: 13 more columns]
