# Supplementary material for: Persistent firing in LEC III neurons is differentially modulated by learning and aging
Source: eLife. 2020 Jul 20;9:e56816. doi: 10.7554/eLife.56816 (PMC7371426; doi:10.7554/eLife.56816)
Supplement: Figure 5—source data 1. — This excel file contains the values for the sAHP and mAHP amplitude. sAHP and mAHP amplitudes for cells from YN and AN animals are in Tables 1 and 2. sAHP and mAHP amplitudes for cells from YC, YP, AU, and AI animals are in Tables 3,6. Five sweeps were evoked from each cell. [file elife-56816-fig5-data1.xlsx]

## Sheet: mAHP YN, AN
	YN mAHP						AN mAHP
Cell #	Sweep1	Sweep2	Sweep3	Sweep4	Sweep5		Sweep1	Sweep2	Sweep3	Sweep4	Sweep5
1	-5.32	-5.58	-5.53	-5.75	-5.69		-7.42	-7.8	-7.07	-7.52	-6.83
2	-4.8	-4.75	-5.33	-5.56	-5.33		-7.49	-6.81	-6.76	-6.38	-6.56
3	-4.31	-4.53	-4.33	-4.49	-3.82		-4.57	-4.61	-4.82	-4.26	-5.26
4	-5.54	-5.31	-5.02	-5.13	-5.04		-7.12	-7.2	-7.4	-7.31	-8.23
5	-6.04	-5.76	-6.19	-6.17	-6.26		-4.69	-4.01	-5	-4.83	-4.7
6	-6.5	-6.73	-6.9	-7.33	-7.11		-6.34	-6.44	-6.48	-6.5	-6.77
7	-5.11	-5.03	-5.02	-5.49	-5.49		-5.79	-6.36	-6.52	-6.28	-7.54
8	-4.6	-4.65	-4.58	-4.98	-4.85		-7.39	-8.1	-8.12	-10.12	-11.42
9	-6.04	-6.5	-5.73	-5.31	-5.35		-9.55	-9.77	-11.78	-9.98	-10.37
10	-5.39	-5.5	-6.01	-5.88	-5.55		-4.79	-5.86	-5.82	-6.08	-5.57
11	-4.66	-5.1	-4.73	-5.29	-5.3		-6.25	-6.42	-6.4	-6	-6.13
12	-6.73	-6.7	-5.82	-6.6	-6.23
13	-7.33	-7.3	-6.85	-8.36	-5.73

## Sheet: sAHP YN, AN
	YN sAHP						AN sAHP
Cell #	Sweep1	Sweep2	Sweep3	Sweep4	Sweep5		Sweep1	Sweep2	Sweep3	Sweep4	Sweep5
1	-4.45	-4.75	-4.39	-4.34	-4.21		-6.32	-6.94	-5.16	-6.2	-5.41
2	-3.98	-3.98	-4.49	-4.57	-3.74		-6.45	-5.95	-5.78	-5.14	-5.61
3	-2.13	-1.82	-1.98	-1.46	-1.62		-2.38	-2.5	-2.37	-1.72	-2.96
4	-3.96	-3.68	-3.6	-3.76	-3.56		-3.63	-3.86	-4.17	-3.57	-4.03
5	-2.95	-2.52	-2.85	-2.25	-2.89		-3.4	-2.84	-3.85	-2.66	-3.28
6	-3.85	-4.13	-4.16	-4.64	-4.37		-2.91	-2.95	-2.86	-2.99	-3.13
7	-3.39	-3.32	-3	-3.29	-3.75		-2.84	-3.03	-3.33	-3.27	-2.94
8	-3.21	-3.62	-3.05	-3.38	-3.4		-4.89	-5.95	-2.76	-7.21	-6.93
9	-3.58	-4.25	-3	-3.09	-3.09		-6.09	-7	-9.04	-7.02	-7.15
10	-3.18	-3.3	-3.44	-3.42	-3.35		-3.02	-4.28	-4.3	-3.94	-3.42
11	-2.54	-3	-2.98	-2.8	-2.81		-3.42	-2.97	-3.25	-3.06	-3.22
12	-4.87	-4.23	-4.05	-4.4	-4.01
13	-5.6	-5.62	-5.06	-6.55	-4.42

## Sheet: mAHP YC, YP, AU, AI
	YC mAHP						YP mAHP						AU mAHP						AI mAHP
Cell #	Sweep1	Sweep2	Sweep3	Sweep4	Sweep5		Sweep1	Sweep2	Sweep3	Sweep4	Sweep5		Sweep1	Sweep2	Sweep3	Sweep4	Sweep5		Sweep1	Sweep2	Sweep3	Sweep4	Sweep5
1	-3.33	-2.95	-3.21	-3.57	-3.6		-7.05	-6.52	-6.44	-6.72	-6.39		-4.64	-5.07	-4.85	-4.73	-4.82		-8.57	-8.88	-9.08	-8.89	-8.73
2	-4.03	-4.09	-4.18	-3.96	-3.86		-6.25	-6.26	-6.42	-6.16	-5.85		-4.56	-5.06	-5.13	-5.64	-5.45		-13.14	-12.14	-13.4	-13.86	-13.38
3	-4.47	-4.96	-4.71	-5.04	-5.25		-7.09	-7.12	-7.18	-7.13	-7.27		-3.78	-4.13	-3.95	-4.29	-4.14		-8.05	-9.09	-8.55	-9.34	-8.79
4	-4.41	-4.65	-4.35	-4.85	-4.24		-6.41	-7.41	-7.41	-6.47	-7.16		-7.2	-6.84	-7.08	-6.93	-7.29		-7.85	-7.98	-7.93	-8.19	-8.27
5	-4.12	-4.21	-4.14	-4.24	-4.38		-4.31	-4.55	-4.62	-4.75	-5.21		-5.95	-5.06	-5.08	-4.92	-5.98		-7.28	-7.4	-6.88	-7.62	-7.04
6	-4.49	-4.72	-4.53	-4.56	-4.53		-6.51	-6.08	-7	-6.61	-6.8		-4.84	-5.4	-5.15	-4.98	-4.6		-7.69	-7.94	-8.98	-8.5	-8.12
7	-4.6	-4.64	-4.89	-5.11	-5.23		-4.25	-3.73	-3.75	-3.89	-3.86		-5.86	-5.44	-5.54	-5.25	-5.43		-6.23	-7.32	-6.2	-6.34	-6.03
8	-4.8	-4.78	-4.87	-4.66	-4.86		-4.51	-5.53	-5.2	-4.95	-4.4		-5.19	-5.34	-5.33	-6.44	-5.24		-5.53	-5.36	-5.99	-6.09	-5.05
9	-4.32	-4.68	-4.83	-4.53	-4.82		-4.81	-4.86		-5.69			-5.15	-5.7	-5.73	-6.52			-8.09	-8.74	-8.56	-9.14	-8.68
10	-3.92	-3.82	-4.38	-3.92	-3.44		-5.29	-5.28	-4.99	-5.19	-5.56		-5.42	-5.72	-5.62	-4.76	-4.81		-6.37	-5.99	-7.28	-6.4	-6.85
11	-4.13	-4.59	-4.52	-4.58	-5.12								-6.07	-5.51	-5.56	-5.5	-5.21
12	-3.36	-3.31	-3.71	-3.97	-4

## Sheet: sAHP YC, YP, AU, AI
	YC sAHP						YP sAHP						AU sAHP						AI sAHP
Cell #	Sweep1	Sweep2	Sweep3	Sweep4	Sweep5		Sweep1	Sweep2	Sweep3	Sweep4	Sweep5		Sweep1	Sweep2	Sweep3	Sweep4	Sweep5		Sweep1	Sweep2	Sweep3	Sweep4	Sweep5
1	-1.79	-1.92	-1.89	-2.24	-2.07		-3.47	-3.23	-2.76	-3.32	-3.07		-2.68	-2.99	-3.29	-3.19	-3.28		-6.77	-7.07	-7.35	-7.28	-6.91
2	-2.49	-1.66	-1.92	-1.97	-1.6		-4.03	-3.76	-3.68	-3.69	-3.22		-2.65	-3.05	-3	-3.84	-3.75		-9.36	-8.63	-9.6	-9.79	-9.36
3	-2.61	-2.53	-2.16	-2.65	-2.73		-4.24	-4.27	-4.4	-4.39	-4.29		-2.92	-2.76	-2.71	-2.99	-2.56		-4.01	-5.55	-4.68	-4.98	-5.06
4	-1.69	-1.9	-1.51	-1.86	-1.64		-3.6	-5.44	-5.39	-4.82	-5.13		-4.01	-3.74	-3.43	-3.69	-3.97		-4.77	-4.67	-5.16	-5	-4.85
5	-1.86	-1.92	-1.46	-1.9	-2.16		-2.34	-2.97	-3.12	-3.31	-3.45		-4.09	-3.15	-3.51	-3.09	-3.52		-5.27	-5.3	-4.96	-5.6	-5.43
6	-3.22	-3.87	-3.89	-3.5	-3.63		-4.19	-3.57	-4.56	-3.36	-4.09		-2.67	-2.98	-3.18	-2.78	-2.79		-3.77	-4.14	-4.89	-3.8	-3.72
7	-2.5	-2.48	-2.89	-2.69	-3.01		-2.24	-2.42	-1.36	-2.27	-1.93		-2.25	-2.35	-2.12	-2.23	-2.32		-2.75	-4.26	-2.92	-2.65	-2.78
8	-2.09	-2	-2.39	-2.33	-2.24		-2.56	-3.44	-3.21	-3	-2.57		-2.64	-3.24	-3.4	-3.92	-2.49		-2.75	-1.88	-2.07	-3.02	-1.8
9	-1.96	-2.13	-2.2	-2.07	-1.99		-2.34	-2.28		-2.43			-2.16	-2.79	-2.72	-3.26			-4.67	-5.4	-5.32	-5.58	-5.37
10	-2.09	-2.23	-2.34	-1.9	-1.65		-2.8	-2.7	-2.73	-2.73	-3.31		-2.82	-3.43	-3.14	-3.16	-2.55		-2.43	-1.04	-2.51	-1.86	-2.39
11	-2.44	-2.73	-2.42	-2.85	-3.01								-4.13	-2.95	-3.41	-2.98	-3.2
12	-1.52	-1.02	-1.7	-1.55	-1.56
