# Supplementary material for: Persistent firing in LEC III neurons is differentially modulated by learning and aging
Source: eLife. 2020 Jul 20;9:e56816. doi: 10.7554/eLife.56816 (PMC7371426; doi:10.7554/eLife.56816)
Supplement: Figure 6—source data 1. — This excel file contains the values for the ADP amplitude and AUC. Data for cells from YN and AN animals are in Tables 1 and 2. Data for cells from YC, YP, AU, and AI animals are in Tables 3,6. Three sweeps were evoked per cell. [file elife-56816-fig6-data1.xlsx]

## Sheet: ADP Amplitude YN, AN
	YN				AN
Cell #	Sweep1	Sweep2	Sweep3		Sweep1	Sweep2	Sweep3
1	0.42	1.593	0.84		0.754	0.31	0.551
2	1.834	1.762	2.121		3.605	1.803	2.116
3	3.572	3.963	3.46		1.485	1.346	2.032
4	1.242	0.526	-1.08e-06		1.181	1.905	1.553
5	3.895	3.874	3.558		0.523	1.771	1.502
6	2.048	3.705	5.251		2.778	3.596	4.255
7	5.972	5.798	4.456		0.608	-0.328	1.853
8	2.558	2.206	3.134		1.143	1.156	2.1
9	1.913	1.314	1.483		3.491	4.127	3.692
10	1.79	3.253	2.853		1.339	1.27	1.441
11	2.443	1.781	2.806		2.994	1.567	1.268
12	2.252	1.953	2.507		-2.47e-06	0.647	0.987
13	3.504	2.977	3.022		0.5	-1.04e-05	-0.079
14	2.384	3.147	3.625		1.319	1.233	2.052
15	1.864	2.683	2.006		1.55	1.753	1.456
16	1.187	1.059	1.518		1.033	1.08	1.841
17	3.077	3.831	3.714		0.831	1.198	2.302
18	1.809	2.819	1.922
19	0.85	1.531	1.501

## Sheet: AUC YN, AN
	YN				AN
Cell #	Sweep1	Sweep2	Sweep3		Sweep1	Sweep2	Sweep3
1	8460.98	97401.8	20967.6		41969.5	11366.9	27279.9
2	121188	114519	136157		237458	80527.1	106329
3	283135	280863	246219		89748.3	83063.4	134467
4	78609.5	29296.2	-24449.4		61860.7	106045	85772.1
5	306386	340842	296204		24923.7	139124	106630
6	137112	276502	406385		131703	211668	247152
7	218351	236624	185379		14681.7	-156778	80159.9
8	181229	153867	215846		21881.6	58776.6	95021.2
9	141369	66302.7	63334.5		215114	308850	236664
10	124608	250443	227957		107267	76640.2	103281
11	173027	103391	169108		53245	70367	60321
12	183155	157380	194743		-25275	27434	68940.1
13	209437	199759	155606		10599.7	-52194.1	-62519
14	140613	229078	246804		100886	76511.8	116692
15	94693.2	171312	124201		65180.7	70362.8	55741.9
16	59912.6	69587.8	104166		39175.2	36009.6	104660
17	177460	252483	224956		39542.9	85537.7	156223
18	95917.8	198247	132606
19	63137.9	94498.7	90228.6

## Sheet: ADP Amplitude YC, YP, AU, AI
	YC				YP				AU				AI
Cell #	Sweep1	Sweep2	Sweep3		Sweep1	Sweep2	Sweep3		Sweep1	Sweep2	Sweep3		Sweep1	Sweep2	Sweep3
1	3.869	6.152	4.019		2.293	2.608	2.733		4.193	5.84			0.783	0.772	0.869
2	5.155	7.051			2.062	2.405	2.12		3.343	3.91	4.084		0.803	1.294	0.638
3	3.995	4.363	4.465		3.147	2.915	4.78		2.955	3.754	2.455		1.995	3.309	3.287
4	4.666	3.713	2.225		1.595	1.675	2.423		3.042	3.705	3.237		1.434	1.345	1.611
5	4.716	4.507	4.417		3.442	3.952	3.49		3.967	3.554	3.691		0.993	1.274	1.942
6	4.723	5.42	4.817		2.186	3.341	3.009		1.291	1.421	2.011		0.981	0.806	0.635
7	4.665	5.524	3.625		3.398	2.637	2.213		3.574	3.265	3.33		3.087	3.487	2.791
8	6.545	6.869	6.151		1.607	2.531	2.636		2.276	3.059	2.812		0.753	1.107	-0.888
9	4.948	4.502	5.252		3.656	4.03	4.968						1.338	1.083	1.335
10	4.097	4.429	3.53		0.917	1.083	1.232						0.978	1.529	1.993
11	4.634	3.852	4.154										0.75	1.487	1.449
12	5.71	5.405	7.464										2.173	0.807
13	4.644	3.607	3.611

## Sheet: AUC YC, YP, AU, AI
	YC				YP				AU				AI
Cell #	Sweep1	Sweep2	Sweep3		Sweep1	Sweep2	Sweep3		Sweep1	Sweep2	Sweep3		Sweep1	Sweep2	Sweep3
1	240340	474562	331723		114795	147001	126361		259761	432373			31264.1	45707.1	57613.2
2	577169	1.05559e+06			130543	138771	132118		227015	322073	347795		32654.8	78773.1	41732.2
3	254681	274927	320659		230418	196595	335076		134990	198553	130166		115154	213670	212482
4	267536	243305	132995		102297	100445	178380		211552	238700	197745		32709.7	75160.2	82183.4
5	291409	326538	285855		215055	270225	231668		278561	235915	244484		36247.9	63692.8	136113
6	326250	324664	274156		146781	233113	199328		73524	64620.8	107075		62613.6	34504.5	33464.3
7	355858	434298	259504		233176	145261	127886		246625	311093	183981		163757	232727	176190
8	342142	432031	389496		66837	138787	161071		149635	151550	177216		14666.1	25326.1	-148565
9	339981	313278	352146		221697	234375	326810						67992.5	80017.8	87544.5
10	271816	361102	284052		21480.8	55319.8	43574.6						53995.4	54784	156569
11	300758	263924	278013										32238.8	101022	93239.7
12	369510	365395	475060										178168	45983.4
13	319310	238683	229064
