# Supplementary material for: Persistent firing in LEC III neurons is differentially modulated by learning and aging
Source: eLife. 2020 Jul 20;9:e56816. doi: 10.7554/eLife.56816 (PMC7371426; doi:10.7554/eLife.56816)
Supplement: Figure 7—source data 1. — This excel file contains the values for the ADP amplitude and AUC for cells from YN and YC animals before and after CdCl2 application. Values for ADP peak are in Tab 1. Values for AUC are in Tab 2. Three sweeps were evoked per cell. [file elife-56816-fig7-data1.xlsx]

## Sheet: ADP Peak Pre-Post CdCl2
	Pre CdCl2				Post CdCl2
Cell	Sweep1	Sweep2	Sweep3		Sweep1	Sweep2	Sweep3
YC - Cell 1	4.097	4.429	3.53		-5.06e-06	0.873	1.359
YC - Cell 2	5.71	5.405	7.464		-4.77e-06	-4.48e-05	-7.31e-07
YC - Cell 3	4.644	3.607	3.611		-0.117	-0.168	-8.43e-07
YN - Cell 1	5.972	5.798	4.456		0.99	0.774	1.036
YN - Cell 2	1.864	2.683	2.006		1.632	-1.15e-05	1.052
YN - Cell 3	1.187	1.059	1.518		0.731	0.661	-7.1e-05
YN - Cell 4	3.077	3.831	3.714		0.765	0.593	0.696
YN - Cell 5	0.85	1.531	1.501		0.963	1.474	0.804

## Sheet: AUC Pre-Post CdCl2
	Pre CdCl2				Post CdCl2
Cell	Sweep1	Sweep2	Sweep3		Sweep1	Sweep2	Sweep3
YC - Cell 1	271816	361102	284052		-8785.64	72826.8	98349.9
YC - Cell 2	369510	365395	475060		-7303.24	-28847.7	-9479.9
YC - Cell 3	319310	238683	229064		-22721.1	-58345.6	-26571.4
YN - Cell 1	218351	236624	185379		78723.7	57077.9	81739.3
YN - Cell 2	94693.2	171312	124201		123828	-18010.8	73748.2
YN - Cell 3	59912.6	69587.8	104166		30700	3850.8	-25967
YN - Cell 4	177460	252483	224956		35567.2	47177.5	35016.1
YN - Cell 5	63137.9	94498.7	90228.6		76171.6	49806.8	65012
